# Supplementary material for: Clinical characteristics and outcomes of B-ALL with ZNF384 rearrangements: a retrospective analysis by the Ponte di Legno Childhood ALL Working Group
Source: PubMed Central journal article supplement (PMC8550960; doi:10.1038/s41375-021-01199-0), 2021-03-10
Supplement: 41375_2021_1199_MOESM1_ESM.pdf [file 41375_2021_1199_MOESM1_ESM.pdf]

# Supplementary Figure 1.

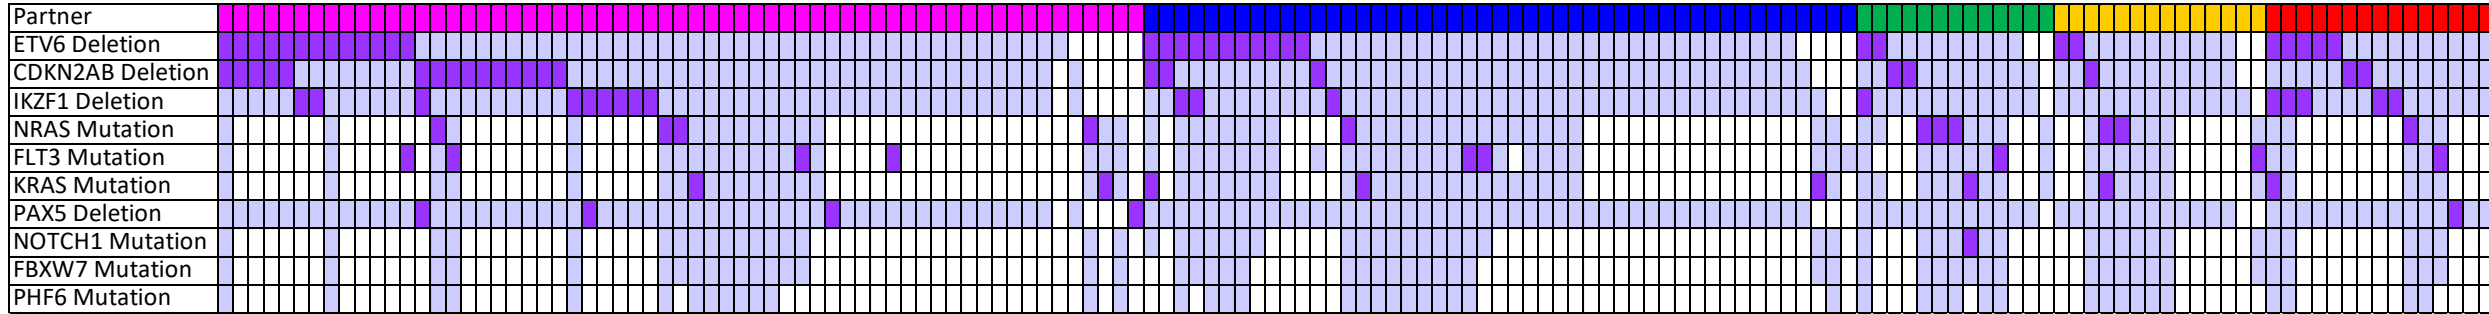

|                   |          |          |       |        |       |
|-------------------|----------|----------|-------|--------|-------|
| Partner           | EP300    | TCF3     | TAF15 | CREBBP | Other |
| Deletion/Mutation | Positive | Negative |       |        |       |
